# Supplementary material for: Quadruplex-single nucleotide polymorphisms (Quad-SNP) influence gene expression difference among individuals
Source: PubMed Central journal article supplement — Nucleic Acids Res. 2012 Jan 11;40(9):3800–11. doi: 10.1093/nar/gkr1258 (PMC3351168; doi:10.1093/nar/gkr1258), 2012-01-11
Supplement: supp_gkr1258_nar-02364-n-2011-File002.pdf [file supp_gkr1258_nar-02364-n-2011-File002.pdf]

Supplementary information for

**Quadruplex-Single Nucleotide Polymorphisms (Quad-SNP) influence gene expression difference among individuals**

Aradhita Baral et al. 2011

**List of SNPs as present in Figure 1A**

| <b>CEU</b> | <b>CHB</b> | <b>JPT</b> | <b>YRI</b> |
|------------|------------|------------|------------|
| rs3758076  | rs9258795  | rs854773   | rs2256820  |
| rs356968   | rs3752129  | rs709117   | rs8051991  |
| rs2256820  | rs7034648  | rs3784400  | rs1673396  |
| rs9970563  | rs3784400  | rs3755799  | rs3743742  |
| rs477935   | rs3755799  | rs12753665 | rs11659635 |
| rs1673396  | rs2294213  | rs1122634  | rs10413334 |
| rs11659635 | rs11570094 | rs12529490 | rs8055206  |
| rs8051991  | rs1022479  | rs3752129  | rs2285659  |
| rs2725391  | rs7272495  | rs7272495  | rs9970563  |
| rs9319617  | rs7099117  | rs2002259  | rs3751068  |
| rs3751068  | rs12753665 | rs2294213  | rs3759541  |
| rs3743742  | rs2002259  | rs9258795  | rs1022479  |
| rs2285659  | rs1871043  | rs12531377 | rs4821599  |
| rs3744028  | rs9450638  | rs9450638  | rs4140871  |

|            |            |            |            |
|------------|------------|------------|------------|
| rs1573736  | rs3862629  | rs3862629  | rs9450638  |
| rs3784400  | rs12672074 | rs1871043  | rs9258795  |
| rs9450638  | rs2303115  | rs4140871  | rs3752129  |
| rs9258795  | rs1122634  | rs4360516  | rs3827249  |
| rs4821599  | rs4140871  | rs2256820  | rs9968886  |
| rs4140871  | rs12529490 | rs3751068  | rs2303115  |
| rs12753665 | rs4821599  | rs356968   | rs3784400  |
| rs11570094 | rs356968   | rs477935   | rs12672074 |
| rs1122634  | rs2285659  | rs1673396  | rs7272495  |
| rs2303115  | rs477935   | rs1573736  | rs7957096  |
| rs1022479  | rs3758076  | rs11659635 | rs3758076  |
| rs7272495  | rs12440651 | rs3758076  | rs2269432  |
| rs1871043  | rs9348724  | rs9319617  |            |
| rs2002259  | rs1673396  | rs9970563  |            |
| rs3752129  | rs7579147  | rs7579147  |            |
| rs2294213  | rs459091   | rs9348724  |            |
| rs3862629  | rs3743742  | rs2285659  |            |
| rs459091   | rs11659635 | rs8051991  |            |
| rs12672074 | rs9970563  | rs3744028  |            |
|            | rs4360516  | rs4821599  |            |
|            | rs9319617  | rs2303115  |            |
|            | rs1633     | rs12672074 |            |
|            | rs3744028  | rs1022479  |            |
|            | rs1573736  | rs459091   |            |
|            | rs8051991  | rs3743742  |            |
|            | rs3751068  |            |            |
|            | rs2256820  |            |            |

**Supplementary Table1**

Details of 54 Quad-SNP significantly correlated( Stranger et al.2007) with gene expression

| <b>Distance_from_TSS</b> | <b>Gene</b> | <b>SNP</b> | <b>Population</b> | <b>P value</b> | <b>Position of SNP</b> |
|--------------------------|-------------|------------|-------------------|----------------|------------------------|
| 24                       | PLCB2       | rs3784400  | CEU-CHB-JPT-YRI   | 1.0E-12        | Upstream of TSS        |
| 91                       | FLJ10640    | rs3743742  | CEU-CHB-JPT-YRI   | 5.0E-09        | Upstream of TSS        |
| 94                       | PLTP        | rs2294213  | JPT               | 1.2E-06        | Downstream of TSS      |
| 94                       | PLTP        | rs2294213  | CEU-CHB-JPT       | 1.8E-11        | Downstream of TSS      |
| 94                       | PLTP        | rs2294213  | CHB-JPT           | 6.8E-09        | Downstream of TSS      |
| 94                       | PLTP        | rs2294213  | CHB-JPT           | 9.6E-11        | Downstream of TSS      |
| 212                      | LOC221711   | rs9348724  | JPT               | 2.8E-07        | Downstream of TSS      |
| 212                      | LOC221711   | rs9348724  | CHB-JPT           | 7.1E-08        | Downstream of TSS      |
| 231                      | ZNF175      | rs3752129  | CEU-CHB-JPT-YRI   | 2.5E-09        | Downstream of TSS      |
| 514                      | CP110       | rs2285659  | CEU-CHB-JPT-YRI   | 5.9E-09        | Downstream of TSS      |
| 556                      | LOC114984   | rs8055206  | YRI               | 6.7E-07        | Upstream of TSS        |
| 2096                     | Hs.485895   | rs9450638  | CEU               | 2.3E-09        | Upstream of TSS        |
| 2096                     | Hs.485895   | rs9450638  | CHB               | 2.3E-09        | Upstream of TSS        |
| 2096                     | Hs.485895   | rs9450638  | JPT               | 1.1E-10        | Upstream of TSS        |
| 2096                     | Hs.485895   | rs9450638  | CEU-CHB-JPT-YRI   | 7.8E-17        | Upstream of TSS        |
| 2096                     | Hs.485895   | rs9450638  | CEU-CHB-JPT       | 7.7E-26        | Upstream of TSS        |
| 2096                     | Hs.485895   | rs9450638  | CHB-JPT           | 2.0E-17        | Upstream of TSS        |
| 3190                     | FLJ21347    | rs1122634  | JPT               | 8.3E-08        | Upstream of TSS        |
| 3190                     | FLJ21347    | rs1122634  | CEU               | 4.2E-10        | Upstream of TSS        |
| 3190                     | FLJ21347    | rs1122634  | CHB               | 1.4E-14        | Upstream of TSS        |
| 3190                     | FLJ21347    | rs1122634  | CEU-CHB-JPT       | 7.6E-19        | Upstream of TSS        |

|       |           |            |                 |         |                   |
|-------|-----------|------------|-----------------|---------|-------------------|
| 3190  | FLJ21347  | rs1122634  | CHB-JPT         | 2.7E-20 | Upstream of TSS   |
| 3190  | FLJ21347  | rs1122634  | YRI             | 3.6E-09 | Upstream of TSS   |
| 5993  | ZFP100    | rs10413334 | YRI             | 1.7E-14 | Downstream of TSS |
| 6224  | STXBP2    | rs2303115  | CEU-CHB-JPT-YRI | 3.4E-08 | Downstream of TSS |
| 7435  | hmm32897* | rs12531377 | CHB             | 4.6E-09 | Upstream of TSS   |
| 7435  | hmm32897* | rs12531377 | JPT             | 1.7E-08 | Upstream of TSS   |
| 8787  | IVD*      | rs2289332  | CHB             | 4.6E-07 | Upstream of TSS   |
| 9835  | Hs.43687  | rs7034648  | CHB             | 2.8E-07 | Downstream of TSS |
| 10495 | C1QTNF6   | rs4140871  | CEU-CHB-JPT-YRI | 5.7E-11 | Upstream of TSS   |
| 10495 | C1QTNF6   | rs4140871  | CEU-CHB-JPT     | 1.1E-08 | Upstream of TSS   |
| 11386 | Hs.473973 | rs3827249  | YRI             | 1.7E-08 | Upstream of TSS   |
| 12182 | MRPL28    | rs1573736  | JPT             | 2.5E-06 | Upstream of TSS   |
| 12182 | MRPL28    | rs1573736  | CEU-CHB-JPT     | 3.6E-06 | Upstream of TSS   |
| 12182 | MRPL28    | rs1573736  | CHB-JPT         | 1.8E-07 | Upstream of TSS   |
| 13312 | ARHGEF19  | rs4360516  | CHB-JPT         | 8.3E-09 | Upstream of TSS   |
| 13733 | LOC114984 | rs8051991  | CEU-CHB-JPT-YRI | 2.0E-09 | Downstream of TSS |
| 14016 | TRIM47    | rs3744028  | CEU-CHB-JPT     | 3.3E-07 | Upstream of TSS   |
| 14250 | C11orf17  | rs3751068  | YRI             | 2.7E-09 | Downstream of TSS |
| 14250 | C11orf17  | rs3751068  | YRI             | 6.6E-08 | Downstream of TSS |
| 14250 | C11orf17  | rs3751068  | CEU-CHB-JPT-YRI | 7.4E-08 | Downstream of TSS |
| 14250 | C11orf17  | rs3751068  | CEU-CHB-JPT-YRI | 1.3E-07 | Downstream of TSS |
| 14547 | Hs.6637   | rs11570094 | CEU             | 5.5E-07 | Downstream of TSS |
| 14547 | Hs.6637   | rs11570094 | CHB             | 4.4E-08 | Downstream of TSS |
| 16233 | C1QTNF6   | rs4821599  | CEU-CHB-JPT-YRI | 1.1E-10 | Upstream of TSS   |
| 16233 | C1QTNF6   | rs4821599  | CEU-CHB-JPT     | 5.5E-08 | Upstream of TSS   |
| 16261 | TCL6      | rs3759541  | YRI             | 1.8E-15 | Downstream of TSS |
| 18986 | TCL1B     | rs3759541  | YRI             | 5.5E-13 | Downstream of TSS |

|       |           |            |                 |         |                   |
|-------|-----------|------------|-----------------|---------|-------------------|
| 20665 | LOC284184 | rs9319617  | CEU             | 9.6E-15 | Upstream of TSS   |
| 20665 | LOC284184 | rs9319617  | CEU-CHB-JPT     | 1.3E-22 | Upstream of TSS   |
| 20665 | LOC284184 | rs9319617  | CHB-JPT         | 4.5E-09 | Upstream of TSS   |
| 20665 | LOC284184 | rs9319617  | CEU             | 9.6E-15 | Upstream of TSS   |
| 20681 | Hs.519979 | rs356968   | YRI             | 8.8E-16 | Upstream of TSS   |
| 20681 | LOC284184 | rs2725391  | CEU             | 2.0E-16 | Downstream of TSS |
| 22387 | C6orf64   | rs9968886  | YRI             | 2.4E-08 | Downstream of TSS |
| 26069 | KIAA1271  | rs7272495  | CEU-CHB-JPT-YRI | 5.1E-18 | Downstream of TSS |
| 26069 | KIAA1271  | rs7272495  | CEU-CHB-JPT     | 3.4E-12 | Downstream of TSS |
| 26069 | KIAA1271  | rs7272495  | CHB-JPT         | 4.1E-07 | Downstream of TSS |
| 31502 | hmm28069  | rs7579147  | CHB-JPT         | 7.1E-07 | Upstream of TSS   |
| 33965 | PHC2      | rs9970563  | CEU-CHB-JPT-YRI | 5.1E-12 | Downstream of TSS |
| 33965 | PHC2      | rs9970563  | CEU-CHB-JPT     | 3.8E-10 | Downstream of TSS |
| 38632 | MRPL21    | rs477935   | JPT             | 4.0E-13 | Upstream of TSS   |
| 38632 | MRPL21    | rs477935   | CEU-CHB-JPT     | 3.8E-09 | Upstream of TSS   |
| 38632 | MRPL21    | rs477935   | CHB-JPT         | 3.1E-13 | Upstream of TSS   |
| 39391 | LOC389362 | rs1633     | CHB             | 2.3E-08 | Upstream of TSS   |
| 39391 | LOC389362 | rs1633     | JPT             | 9.3E-08 | Upstream of TSS   |
| 47209 | C10orf64  | rs7099117  | CHB-JPT         | 4.1E-09 | Downstream of TSS |
| 48036 | ZNRD1     | rs11754620 | JPT             | 7.4E-09 | Upstream of TSS   |
| 55477 | VRK3      | rs10413334 | YRI             | 2.2E-06 | Downstream of TSS |
| 64717 | LOC347981 | rs356968   | CHB-JPT         | 3.3E-12 | Downstream of TSS |
| 64717 | LOC347981 | rs356968   | JPT             | 1.0E-11 | Downstream of TSS |
| 64717 | LOC347981 | rs356968   | CEU-CHB-JPT     | 2.8E-09 | Downstream of TSS |
| 67263 | SIAT4C    | rs3862629  | CEU-CHB-JPT     | 4.4E-09 | Downstream of TSS |
| 73430 | LOC197322 | rs2002259  | CEU-CHB-JPT     | 2.8E-14 | Downstream of TSS |
| 76773 | RABGEF1   | rs12531377 | JPT             | 1.8E-09 | Downstream of TSS |

|        |           |            |                 |         |                   |
|--------|-----------|------------|-----------------|---------|-------------------|
| 78314  | LOC347981 | rs9258795  | JPT             | 4.7E-10 | Upstream of TSS   |
| 78314  | LOC347981 | rs9258795  | CEU-CHB-JPT-YRI | 5.0E-11 | Upstream of TSS   |
| 78314  | LOC347981 | rs9258795  | CEU-CHB-JPT     | 1.2E-08 | Upstream of TSS   |
| 79999  | ARL6IP4   | rs7957096  | YRI             | 4.9E-07 | Downstream of TSS |
| 81210  | Hs.211939 | rs4846233  | CHB             | 9.5E-07 | Downstream of TSS |
| 88929  | ZNRD1     | rs2256820  | JPT             | 1.9E-07 | Upstream of TSS   |
| 88929  | ZNRD1     | rs2256820  | CEU-CHB-JPT-YRI | 7.3E-10 | Upstream of TSS   |
| 88929  | ZNRD1     | rs2256820  | CHB-JPT         | 1.3E-07 | Upstream of TSS   |
| 104427 | C1orf16   | rs12753665 | CEU             | 7.4E-09 | Downstream of TSS |
| 104427 | C1orf16   | rs12753665 | CEU-CHB-JPT     | 3.2E-07 | Downstream of TSS |
| 104916 | PKHD1L1   | rs1673396  | CEU             | 3.7E-09 | Downstream of TSS |
| 104916 | PKHD1L1   | rs1673396  | CHB             | 2.7E-11 | Downstream of TSS |
| 104916 | PKHD1L1   | rs1673396  | JPT             | 1.0E-08 | Downstream of TSS |
| 104916 | PKHD1L1   | rs1673396  | YRI             | 3.4E-07 | Downstream of TSS |
| 104916 | PKHD1L1   | rs1673396  | CEU-CHB-JPT-YRI | 5.7E-28 | Downstream of TSS |
| 104916 | PKHD1L1   | rs1673396  | CEU-CHB-JPT     | 5.6E-26 | Downstream of TSS |
| 104916 | PKHD1L1   | rs1673396  | CHB-JPT         | 6.8E-19 | Downstream of TSS |
| 116532 | FLJ20635  | rs1022479  | JPT             | 3.0E-08 | Downstream of TSS |
| 116532 | FLJ20635  | rs1022479  | CEU-CHB-JPT-YRI | 9.4E-14 | Downstream of TSS |
| 116532 | FLJ20635  | rs1022479  | CEU-CHB-JPT     | 3.5E-17 | Downstream of TSS |
| 116532 | FLJ20635  | rs1022479  | CHB-JPT         | 7.2E-12 | Downstream of TSS |
| 120642 | FCGBP     | rs459091   | CEU-CHB-JPT     | 1.3E-08 | Upstream of TSS   |
| 120642 | FCGBP     | rs459091   | CHB-JPT         | 5.7E-09 | Upstream of TSS   |
| 130039 | PIGN      | rs11659635 | JPT             | 1.7E-07 | Downstream of TSS |
| 130039 | PIGN      | rs11659635 | CEU-CHB-JPT-YRI | 1.3E-10 | Downstream of TSS |
| 130039 | PIGN      | rs11659635 | CEU-CHB-JPT     | 9.8E-09 | Downstream of TSS |
| 178647 | RPS6KB2   | rs1871043  | CEU-CHB-JPT     | 1.2E-07 | Downstream of TSS |

|        |           |            |                 |         |                   |
|--------|-----------|------------|-----------------|---------|-------------------|
| 211988 | SHMT1     | rs854773   | JPT             | 8.4E-07 | Downstream of TSS |
| 213067 | CCNDBP1   | rs12440651 | CHB             | 2.9E-06 | Upstream of TSS   |
| 217820 | CA13      | rs3758076  | CEU-CHB-JPT-YRI | 1.1E-06 | Downstream of TSS |
| 240123 | FLJ12442  | rs3755799  | CHB-JPT         | 4.2E-07 | Upstream of TSS   |
| 267493 | LOC402476 | rs12672074 | YRI             | 4.5E-08 | Downstream of TSS |
| 267493 | LOC402476 | rs12672074 | CEU-CHB-JPT-YRI | 3.3E-18 | Downstream of TSS |
| 267493 | LOC402476 | rs12672074 | CEU-CHB-JPT     | 4.9E-12 | Downstream of TSS |
| 267493 | LOC402476 | rs12672074 | CHB-JPT         | 5.5E-10 | Downstream of TSS |
| 272678 | HEMK      | rs2269432  | YRI             | 1.3E-07 | Upstream of TSS   |
| 327324 | SUPT3H    | rs12529490 | CHB-JPT         | 2.2E-09 | Downstream of TSS |
| 327324 | SUPT3H    | rs12529490 | JPT             | 4.3E-10 | Downstream of TSS |

\* gene nearest to the Quad-SNP

## Supplementary Table 2

Details of 5 Quad- SNPs for which CD and melting experiments are given in text (Figure 1B). SNPs are shown in red font.

| SNP id     | Gene        | G4 sequence with 1st allelic form | G4 sequence with 2nd allelic form |
|------------|-------------|-----------------------------------|-----------------------------------|
| rs37521129 | ZNF175      | GGGGGTTTCTGGGGTGGGTGATGGGTG       | AGGGGTTTCTGGGGTGGGTGATGGGTG       |
| rs9450638  | Hs485895    | GGGGCTGAAGGGCTAAGGGAAAAGGGGA      | GGGGCTGAAGGGCTAAGGGAAAAGGGGA      |
| rs11570094 | Hs.6637 - S | GGGGTGGAGGAGGGAAAGGGCCTTTTGGG     | GGGGTGGAGGAGGGAAAGGGCCTTTTGGG     |
| rs3744028  | TRIM47      | GGGCAGGGATGTGGGGAGGCAGGG          | GGGTCAGGGATGTGGGGAGGCAGGG         |
| rs477935   | MRLP21      | GGGGTGCTGGGCAGGGCAGTGGG           | GGGGTGCCGGGCAGGGCAGTGGG           |



### Supplementary Table 3

Derived allele frequency (DAF) of Quad-SNP was binned into 10 categories. Fraction of Quad-SNPs present in each category of DAF across the four HapMap populations is shown. For each bin the fraction has been calculated with respect to the number of Quad-SNP present in respective regions.

|                | Fraction of SNP |      |          |      |      |          |      |      |          |      |      |          |
|----------------|-----------------|------|----------|------|------|----------|------|------|----------|------|------|----------|
|                | CEU             |      |          | YRI  |      |          | CHB  |      |          | JPT  |      |          |
| DAF            | STEM            | LOOP | QUAD-SNP | STEM | LOOP | QUAD-SNP | STEM | LOOP | QUAD-SNP | STEM | LOOP | QUAD-SNP |
| <b>0-0.1</b>   | 0.48            | 0.38 | 0.436    | 0.48 | 0.39 | 0.441    | 0.44 | 0.37 | 0.408    | 0.46 | 0.40 | 0.431    |
| <b>0.1-0.2</b> | 0.12            | 0.08 | 0.103    | 0.10 | 0.12 | 0.108    | 0.13 | 0.12 | 0.124    | 0.10 | 0.08 | 0.093    |
| <b>0.2-0.3</b> | 0.08            | 0.05 | 0.069    | 0.07 | 0.07 | 0.072    | 0.05 | 0.07 | 0.060    | 0.06 | 0.07 | 0.068    |
| <b>0.3-0.4</b> | 0.07            | 0.06 | 0.069    | 0.07 | 0.11 | 0.086    | 0.07 | 0.06 | 0.064    | 0.05 | 0.09 | 0.068    |
| <b>0.4-0.5</b> | 0.04            | 0.11 | 0.069    | 0.08 | 0.09 | 0.082    | 0.04 | 0.06 | 0.050    | 0.08 | 0.08 | 0.082    |
| <b>0.5-0.6</b> | 0.07            | 0.05 | 0.058    | 0.08 | 0.08 | 0.079    | 0.06 | 0.10 | 0.074    | 0.03 | 0.05 | 0.036    |
| <b>0.6-0.7</b> | 0.05            | 0.10 | 0.072    | 0.04 | 0.03 | 0.036    | 0.05 | 0.06 | 0.053    | 0.04 | 0.06 | 0.050    |
| <b>0.7-0.8</b> | 0.02            | 0.05 | 0.031    | 0.02 | 0.04 | 0.029    | 0.03 | 0.06 | 0.046    | 0.03 | 0.03 | 0.028    |
| <b>0.8-0.9</b> | 0.03            | 0.05 | 0.038    | 0.02 | 0.05 | 0.032    | 0.01 | 0.04 | 0.025    | 0.04 | 0.07 | 0.053    |
| <b>0.9-1</b>   | 0.04            | 0.08 | 0.055    | 0.05 | 0.02 | 0.036    | 0.13 | 0.06 | 0.096    | 0.11 | 0.07 | 0.093    |

## Supplementary Figure 1

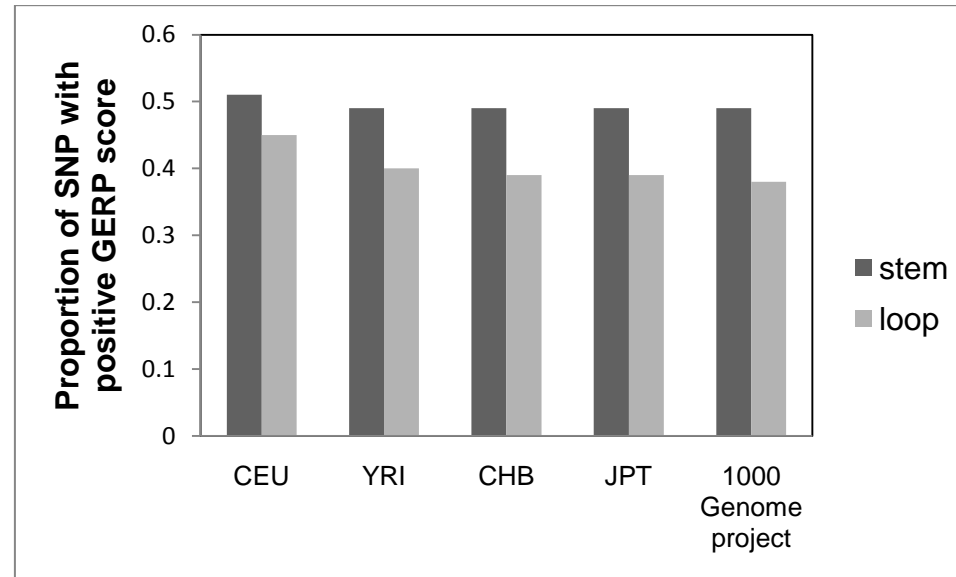

Higher proportion of stem Quad-SNP harbor positive RS score by GERP analysis as compared to loop SNPs (two tailed t-test,  $P = 0.001$ ).
